# Supplementary material
Source: PubMed Central journal article supplement (PMC1892948)

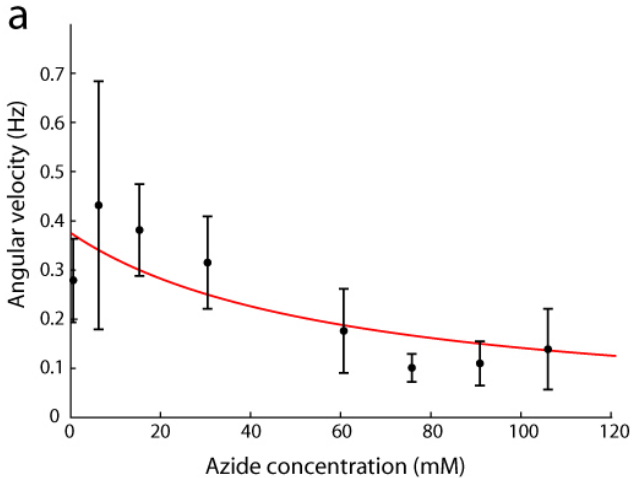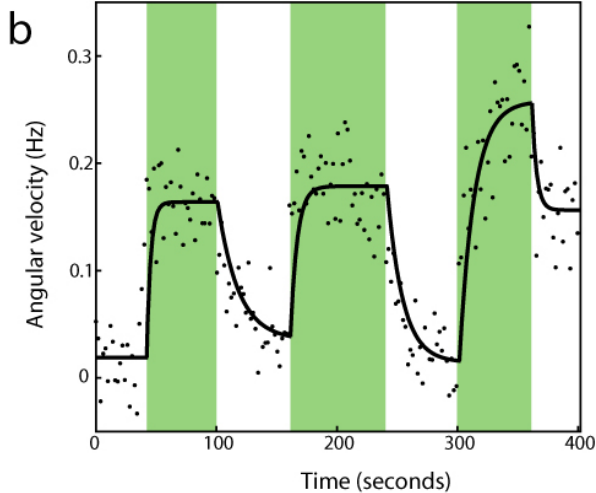

Supplement: pnas_0611035104_1.pdf [file pnas_0611035104_1.pdf]

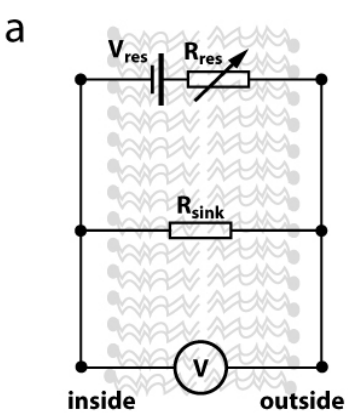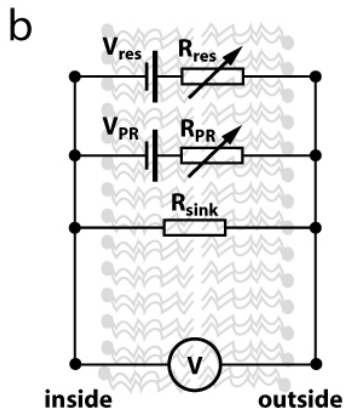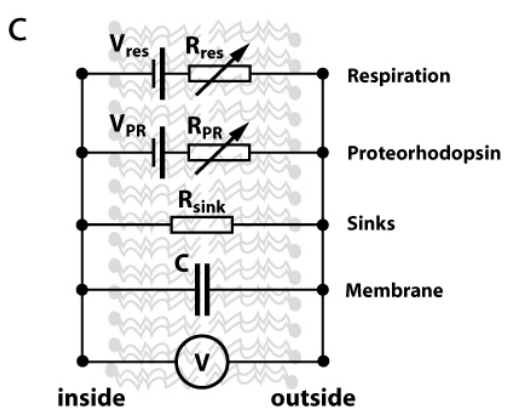

Supplement: pnas_0611035104_2.pdf [file pnas_0611035104_2.pdf]
